# Supplementary material for: COVID-19 severity and management: a descriptive cross-sectional study among healthcare workers in selected hospitals in the Greater Accra Region, Ghana
Source: Research Square preprint supplement (doi:10.21203/rs.3.rs-8516994/v1), 2026-02-11
Supplement: Supplementary file 1 [file 790ddbc5dd6648e38f74a594.docx]

**QUESTIONNAIRE**

**COVID-19 severity and management: A Descriptive Cross-Sectional Study among Healthcare Workers in Selected Hospitals in The Greater Accra Region, Ghana**

| Hospital ID *(hospID)*: __________________  Participant’s ID *(studyID)*: ______________  Interviewer’s ID (Int_ID)  Participant’s Tel: _____________________ | Date of COVID-19 diagnosis: ____________  *(diagnosed)* (dd-mm-yyyy)  Date of Recruitment: ___________________  *(recruit)* (dd-mm-yyyy)    Date of Interview:______________________  *(interview)* (dd-mm-yyyy)  Start Time of interview: ------------------------ |
| --- | --- |

**I am about to ask you questions to determine if you are eligible to participate in this study**

| **INFORMED CONSENT** | |
| --- | --- |
| a. Does the participant meet all inclusion criteria? | a. Yes  b. No |
| b. Do you consent to be part of the study? | a. Yes  b. No |

**I want to ask you questions on your background characteristics**

**Instruction: Please Tick (√) appropriate response**

**A: BACKGROUND CHARACTERISTICS**

| **No.** | **Question** | **Response** |  |
| --- | --- | --- | --- |
|  | Participant’s Age | ____________________ | *Page* |
| 2 | Participant’s sex | [ 1] Female  [ 0] Male | *sex* |
| 3 | Current place of work | a. Greater Accra Regional Hospital  b. Shai Osudoku District Hospital  c. Achimota Hospital  d. Tema General Hospital | *placeOfWork* |
| 4 | How many other places do you work (apart from your current place of work)? | 0  1  2  3  4 or more | *placeOfWork1* |
| 5 | What is your highest Level of Education | [ 1 ] No formal education  [ 2 ] Primary school but uncompleted  [ 3 ] Primary school completed  [ 4 ] Middle school uncompleted  [ 5 ] Middle school completed  [ 6 ]Senior High School uncompleted  [ 7 ]Senior high school completed  [ 8 ]Diploma completed  [ 9 ]Diploma uncompleted  [ 10 ] University completed  [ 11 ] University uncompleted | *educ* |
| 6 | Religion | Catholic=0  Protestant=1  Pentecostal/Charismatic=2  Muslim=3  Traditional/spiritualist=4  Agnostic=5  Atheist=6  I prefer not to talk about it=7 Other, (Please specify)………………………………… | *religion* |
| 7 | Which of the following best describes your profession | [ 1 ] Doctor  [ 2 ] Nurse  [ 3 ] Laboratory Scientist  [ 4] Pharmacist  [ 5 ] Morgue attendant  [ 4 ] Other, (Please specify)………………………… | *employ* |
| 8 | What is your rank | ………………………….. | *rank* |
| 9 | How many years have you worked in your current place of work? | …………………….. | *Years_work* |
| 10 | Which of the following best describes your Marital status? | [ 1 ] never married  [ 2 ] Married  [ 3 ] Divorced  [ 4 ]Separated  [ 5 ]Widowed/Widower  [ 6 ] Co-habiting  [ 7 ] I don’t want to talk about it | *maritalstatus* |
| 11 | What is your monthly net salary? | [ 1 ] less than GH₵ 1,000  [ 2 ] GH₵ 1,001 – 2,000  [ 3 ] GH₵ 2,001 – 3,000  [ 4 ] More than GH₵ 3,000 | *Net_salary* |
| 12 | Number of dependents | ------------- children  ------------- adolescents  ------------- adults  None | *dependents* |

| **COMORBIDITY**  **I want to ask questions about your personal and family history of comorbidity** | | | |
| --- | --- | --- | --- |
| 13  14 | Do you have any family history of a disease?  **Who among the family has it and which disease**  **(Tick all that applies)** | 1. Yes 2. No **(skip to number 15)**  | DISEASE | FATHER | MOTHER | SIBLING | | --- | --- | --- | --- | | Hypertension | a.Yes  b.No  c.Unknown | a.Yes  b.No  c.Unknown | a.Yes  b.No  c.Unknown | | Diabetes | a.Yes  b.No  c.Unknown | a.Yes  b.No  c.Unknown | a.Yes  b.No  c.Unknown | | Asthma | a.Yes  b.No  c.Unknown | a.Yes  b.No  c.Unknown | a.Yes  b.No  c.Unknown | | Mental illness | a.Yes  b.No  c.Unknown | a.Yes  b.No  c.Unknown | a.Yes  b.No  c.Unknown | | Sickle Cell Disease | a.Yes  b.No  c.Unknown | a.Yes  b.No  c.Unknown | a.Yes  b.No  c.Unknown | | Chronic obstructive pulmonary disease | a.Yes  b.No  c.Unknown | a.Yes  b.No  c.Unknown | a.Yes  b.No  c.Unknown | | Renal disease | a.Yes  b.No  c.Unknown | a.Yes  b.No  c.Unknown | a.Yes  b.No  c.Unknown | | Liver disease | a.Yes  b.No  c.Unknown | a.Yes  b.No  c.Unknown | a.Yes  b.No  c.Unknown | | Other (specify)  …………….  …………….. |  |  |  | |  |  |  |  | | *familyHxDx*  *familyHxDx1* |

| 15 | Did you have any known disease chronic disease before the COVID 19 pandemic? | a.Yes  b.No **(skip to number 19)** | *PersonaHxDx* |
| --- | --- | --- | --- |
| 16 | If Yes to **Question 25**, What disease (check all that apply) | [ 1 ] Hypertension  [ 2 ] Diabetes mellitus  [ 3 ] Asthma  [ 4 ] Renal disease  [ 5 ] Liver disease  [ 6 ] HIV  [ 7 ] Mental illness  [ 8 ] COPD  [ 9 ] Sickle Cell Disease  [ 10 ] Other (Specify) |  |
| 17` | Are you currently on any medication? | a.Yes  b.No **(skip to number 19)** |  |
| 18 | If Yes, what are these medications? (explain for each disease) | .................................................  ……………………………….  ……………………………….  ……………………………….  ……………………………….  ………………………………. | *Drug_Hx* |

| **LIFESTYLE**   | **Now I am going to ask you some questions about various lifestyles that can influence your health. These include; smoking, drinking alcohol and physical activity. Let’s start with smoking** | | --- | | 19. Have you ever smoked cigarettes for a year or more??  a. Never smoked **(skip to number 24)**  b. Former smoker **(skip to number 20)**  c. Current smoker **(skip to number 22)**  20. How old were you when you started smoking  …………………….  21. How many sticks of cigarettes did you smoke each day, on average  …………………………….  22. How old were you when you started smoking?  23. How many sticks of cigarettes do you smoke each day on average?  24. Do you have friends or family members who smoke?  a. Yes  b. No **(skip to number 26)**  25. Approximately how many sticks of cigarettes does the person smoke per day?  ………………………..  26. Do you think you are exposed to second hand smoke?  a. Yes  b. No **(skip to number 30)**  **27.** Where is the place of exposure to the second hand smoke? (Tick all that applies)  a. Home  b. Public places  c. Other (Specify)………………..  28. Approximately how many days per week are you exposed to second-hand smoke?  a. Daily  b.1-2 days  c. 3-4days  d. 5-6days  29. Approximately how many hours per day are you exposed to second hand smoke?  a. 1-4hours  b. More than 4hours  **ALCOHOL CONSUMPTION**  30. Have you ever consumed an alcoholic drink such as beer, wine, and spirits?   1. Yes 2. No (**skip to question 34)**   31. Have you consumed an alcoholic drink within the past 12 months?   1. Daily 2. 1-4days per weeks 3. 1-3 days per month 4. Less than once a month   32. Have you consumed an alcoholic drink within the past 30 days   1. Yes 2. b. No (**skip to question 34)**   33. During the past 30 days, on how many times did take an alcoholic drink?  ……………………. |   **PHYSICAL ACTIVITY**  **Next I am going to ask you about the time you spend doing different types of physical activity in a typical week. Please answer these questions even if you do not consider yourself to be a physically active person. Think first about the time you spend doing work. Think of work as the things that you have to do such as paid or unpaid work, study/training, household chores, harvesting food/crops, fishing or hunting for food, seeking employment. [Insert other examples if needed]. In answering the following questions 'vigorous-intensity activities' are activities that require hard physical effort and cause large increases in breathing or heart rate, 'moderate-intensity activities' are activities that require moderate physical effort and cause small increases in breathing or heart rate.**  34. Does your work involve vigorous-intensity activity that causes large increases in breathing or heart rate?   1. Yes 2. No **(skip to question 37)**   35. In a typical week, on how many days do you do vigorous-intensity activities as part of your work?  ……………………………  36. How much time do you spend doing vigorous-intensity activities at work on a typical day?  …………………..  37. Does your work involve moderate-intensity activity, that causes small increases in breathing or heart rate such as brisk walking [or carrying light loads] for at least 10 minutes continuously?   1. Yes 2. No **(skip to question 40)**   38. In a typical week, on how many days do you do moderate-intensity activities as part of your work?  ………………………  39. How much time do you spend doing moderate-intensity activities at work on a typical day?  ………………………  **The next questions exclude the physical activities at work that you have already mentioned. Now I would like to ask you about the usual way you travel to and from places. For example to work, for shopping, to market, to place of worship**  40. Do you walk or use a bicycle (pedal cycle) for at least 10 minutes continuously to get to and from places?   1. Yes 2. No **(skip to question 43)**   41. In a typical week, on how many days do you walk or bicycle for at least 10 minutes continuously to get to and from places?  ………………………  42. How much time do you spend walking or bicycling for travel on a typical day?  …………………………  **The next questions exclude the work and transport activities that you have already mentioned. Now I would like to ask you about sports, fitness and recreational activities (leisure)**  43. Do you do any vigorous-intensity sports, fitness or recreational (leisure) activities that cause large increases in breathing or heart rate like [running or football] for at least 10 minutes continuously?   1. Yes 2. No **(skip to question 46)**   44. In a typical week, on how many days do you do vigorous-intensity sports, fitness or recreational (leisure) activities?  ……………………………….  45. How much time do you spend doing vigorous-intensity sports, fitness or recreational activities on a typical day?  …………………………….  46. Do you do any moderate-intensity sports, fitness or recreational (leisure) activities that cause a small increase in breathing or heart rate such as brisk walking, [cycling, swimming, volleyball] for at least 10 minutes continuously?   1. Yes 2. No **(skip to question 49)**   47. In a typical week, on how many days do you do moderate-intensity sports, fitness or recreational (leisure) activities?  …………………..  48. How much time do you spend doing moderate-intensity sports, fitness or recreational (leisure) activities on a typical day?  …………………… |
| --- | --- | --- |

| **COVID-19 INFECTION CLINICAL CHARACTERISTICS** |
| --- |
| **I am about to ask you some questions in relation to your experience with COVID-19 infection COVID-19 Screening characteristics**   1. Have you ever done COVID-19 test (Polymerase Chain Reaction)?   a. Yes  b. No   1. How many times have you had the COVID-19 test done?    1. Once    2. Twice    3. Thrice    4. More than 3 times 2. What informed your decision to get tested for COVID-19 infection? 3. I was exhibiting COVID-19 signs and symptoms (go to 52) 4. I just decided to get tested (go to 53) 5. I was exposed to a COVID 19 patient (go to 53) 6. It was my facilities policy to get tested (go to 53) 7. Which of the following did you exhibit? (Choose all that applies) 8. Fever 9. Difficulty in breathing 10. Cough 11. Cold 12. Loss of taste 13. Loss of smell 14. Headache 15. Fatigue 16. Diarrhea 17. Other (Please specify) ……. 18. Have you ever tested positive for COVID-19?     1. Yes     2. No **(skip to number 55)** 19. How many times have you tested positive for COVID-19     1. Once     2. Twice     3. Thrice     4. More than 3 times 20. How long did it take for you to receive your COVID-19 results? 21. Within 72hours 22. 1 week- 2weeks 23. 2-4weeks 24. More than a month 25. Have you been vaccinated against COVID-19 infection? 26. Yes, full dose 27. Yes, partial dose 28. No **(Skip to number 58)** 29. Have you tested positive after vaccination?     1. Yes     2. No 30. Which of the following best describes your experience with COVID-19 infection     1. I was not admitted to hospital with resumption of normal activities     2. I was not admitted to hospital, but unable to resume normal activities     3. I was admitted to hospital but not requiring supplemental oxygen     4. I was admitted to hospital but requiring supplemental oxygen     5. I was admitted to hospital requiring high-flow nasal cannula (HFNC), non-invasive mechanical ventilation (NIV), or both     6. I was admitted to hospital requiring extracorporeal membrane oxygenation, invasive mechanical ventilation (IMV), or both     7. I have never had COVID-19 infection **(Skip to number 66)**  | **MANAGEMENT OF COVID-19 INFECTION**  **I am about to ask you some questions in relation to how you were managed for COVID-19 infection** | | --- |  1. Where did you receive treatment for the COVID-19 infection? 2. I was managed at home **(Skip to number 61)** 3. I was admitted at the COVID-19 isolation/treatment center 4. I was admitted at the COVID-19 Intensive care unit 5. If you were admitted, how long did you stay on admission? 6. 1 week or less 7. Two weeks 8. Three weeks 9. 1 month or more 10. Which of the following clinical investigations did you do (Tick all that applies)? 11. Chest x-ray 12. Electrocardiogram (ECG) 13. Procalcitonin 14. Troponin 15. C-Reactive Protein (CRP) 16. Chest Computed Tomography (CT) Scan 17. Magnetic Resonance Imaging (MRI) 18. Full blood count 19. Blood Urea and Creatinine (BUE & Cr) 20. Liver function test 21. D-Dimer 22. Lactate Dehydrogenase (LDH) 23. Ferritin 24. Other (Please Specify 25. Which medications were you managed with? Tick all that applies. 26. Hydroxychloroquine 27. Ivermectin 28. Azithromycin 29. Doxycycline 30. Rocephin (Ceftriaxone) 31. Meronem 32. Methylprednisolone 33. Dexamethasone 34. Tocilizumab 35. Vitamin C+Zinc 36. Remdesevir 37. Soluble aspirin 38. Xarelto 39. Clexane/Fragmin 40. Decathylene Losenges 41. Rhinathiol 42. Other (please Specify) 43. Were the medications supplied to you by the hospital or you bought them yourself?     1. I bought them myself     2. They were provided by the hospital     3. Either ways 44. Did you take any herbal concoction in managing the disease? 45. Yes 46. No Never **(Skip to number 65)** 47. If yes to **Ques 61,** which herbal preparations were you taking? **(list all in the space provided)**   ……………………………………  **End Time ……………** |
